# Supplementary material
Source: HighWire-hosted journal article supplement (https://bmjopen.bmj.com/content/13/11/e075113)
Supplement: inline-supplementary-material-1 [file inline-supplementary-material-1.pdf]

**Table S1:** Training matrix for O&G (adapted from RCOG). Required laparoscopic competencies are highlighted in **bold**. Competencies are signed off based on an entrustability scale\* and as such no indicative numbers are included here.

|                                                                                                                                                           | ST1                                                                                             | ST2                                                                                                                                                                                                                                                                                                       | ST3                                                                              | ST4                                                                                                                  | ST5                                                                                                                                                                                                                             | ST6 | ST7                                                                                                                                                                                                             |
|-----------------------------------------------------------------------------------------------------------------------------------------------------------|-------------------------------------------------------------------------------------------------|-----------------------------------------------------------------------------------------------------------------------------------------------------------------------------------------------------------------------------------------------------------------------------------------------------------|----------------------------------------------------------------------------------|----------------------------------------------------------------------------------------------------------------------|---------------------------------------------------------------------------------------------------------------------------------------------------------------------------------------------------------------------------------|-----|-----------------------------------------------------------------------------------------------------------------------------------------------------------------------------------------------------------------|
| Curriculum                                                                                                                                                | CiP progress appropriate to the relevant stage as per the CiP guides and entrustability levels. |                                                                                                                                                                                                                                                                                                           |                                                                                  |                                                                                                                      |                                                                                                                                                                                                                                 |     |                                                                                                                                                                                                                 |
| Examination                                                                                                                                               | MRCOG Part 1                                                                                    |                                                                                                                                                                                                                                                                                                           |                                                                                  | MRCOG Part 2 & Part 3                                                                                                |                                                                                                                                                                                                                                 |     |                                                                                                                                                                                                                 |
| At least 3 summative OSATS confirming competency by more than one assessor. At least one OSAT confirming competence should be supervised by a consultant. | Cervical smear                                                                                  | Caesarean section (Basic)<br><br>Non rotational assisted vaginal delivery (Ventouse & forceps)<br><br>Perineal repair<br><br>Surgical management of miscarriage/Surgical termination of pregnancy<br><br>Insertion of an Intrauterine system/intrauterine contraceptive device.<br><br>Endometrial biopsy | Manual removal of placenta<br><br>Transabdominal USS of early and late pregnancy | Hysteroscopy<br><br><b>Diagnostic laparoscopy</b><br><br>3 <sup>rd</sup> degree perineal repair<br><br>Vulval biopsy | <b>Simple operative laparoscopy</b> (laparoscopic sterilisation or simple adnexal surgery e.g. adhesiolysis/ ovarian drilling)<br><br>Caesarean section (Intermediate)<br><br>Rotational assisted vaginal delivery (any method) |     | Subspecialty specific competencies.<br><br><b>Laparoscopic management of ectopic pregnancy</b><br><br><b>Ovarian cystectomy (laparoscopic &amp; open)</b><br><br>Surgical management of post partum haemorrhage |

\*Entrustability scale: 1= observe only, 2= direct supervision, 3= indirect supervision, 4= act independently with support, 5= act independently.
